# Supplementary material for: Functional annotation of the animal genomes: An integrated annotation resource for the horse
Source: PLoS Genet. 2023 Mar 2;19(3):e1010468. doi: 10.1371/journal.pgen.1010468 (PMC10013926; doi:10.1371/journal.pgen.1010468)
Supplement: S1 Table — GO enrichment analysis of peaks conserved across all nine tissues. (XLSX) [file pgen.1010468.s007.xlsx]

## Sheet: Sheet1
Analysis Type:	PANTHER Overrepresentation Test (Released 20220202)
Analyzed List:	ubiquitous peaks (Equus caballus)
Reference List:	Equus caballus (all genes in database)
Test Type:	FISHER
Correction:	FDR
GO molecular function complete	Equus caballus - REFLIST (20864)	ubiquitous peaks (3438)	ubiquitous peaks (expected)	ubiquitous peaks (over/under)	ubiquitous peaks (fold Enrichment)	ubiquitous peaks (raw P-value)	ubiquitous peaks (FDR)
G protein-coupled receptor activity (GO:0004930)	1445	14	238.11	-	0.06	1.63e-77	7.12e-74
olfactory receptor activity (GO:0004984)	1020	0	168.08	-	< 0.01	1.38e-69	3.02e-66
transmembrane signaling receptor activity (GO:0004888)	1840	51	303.2	-	0.17	1.09e-68	1.58e-65
molecular transducer activity (GO:0060089)	2001	88	329.73	-	0.27	5.6e-54	4.89e-51
signaling receptor activity (GO:0038023)	2001	88	329.73	-	0.27	5.6e-54	6.12e-51
binding (GO:0005488)	11253	2235	1854.29	+	1.21	3.12e-34	2.27e-31
organic cyclic compound binding (GO:0097159)	5047	1159	831.65	+	1.39	6.39e-31	3.99e-28
heterocyclic compound binding (GO:1901363)	4982	1146	820.94	+	1.4	9.77e-31	5.34e-28
protein binding (GO:0005515)	5831	1260	960.84	+	1.31	1.84e-24	8.93e-22
nucleic acid binding (GO:0003676)	3115	729	513.29	+	1.42	1.69e-19	7.38e-17
enzyme binding (GO:0019899)	1609	431	265.13	+	1.63	2.77e-19	1.1e-16
odorant binding (GO:0005549)	280	0	46.14	-	< 0.01	3.11e-19	1.13e-16
nucleoside phosphate binding (GO:1901265)	1924	494	317.04	+	1.56	4.44e-19	1.38e-16
nucleotide binding (GO:0000166)	1924	494	317.04	+	1.56	4.44e-19	1.49e-16
purine ribonucleoside triphosphate binding (GO:0035639)	1621	426	267.11	+	1.59	8.35e-18	2.28e-15
purine nucleotide binding (GO:0017076)	1690	440	278.48	+	1.58	7.9e-18	2.3e-15
adenyl nucleotide binding (GO:0030554)	1348	368	222.13	+	1.66	1.5e-17	3.87e-15
purine ribonucleotide binding (GO:0032555)	1673	435	275.68	+	1.58	1.71e-17	3.93e-15
adenyl ribonucleotide binding (GO:0032559)	1339	366	220.64	+	1.66	1.63e-17	3.96e-15
ATP binding (GO:0005524)	1297	357	213.72	+	1.67	1.97e-17	4.3e-15
small molecule binding (GO:0036094)	2204	540	363.18	+	1.49	2.54e-17	5.29e-15
ribonucleotide binding (GO:0032553)	1686	436	277.82	+	1.57	3.76e-17	7.46e-15
catalytic activity (GO:0003824)	5528	1139	910.91	+	1.25	1.84e-15	3.49e-13
transferase activity (GO:0016740)	2117	511	348.84	+	1.46	2.05e-15	3.74e-13
RNA binding (GO:0003723)	1011	282	166.59	+	1.69	1.67e-14	2.92e-12
anion binding (GO:0043168)	2112	502	348.02	+	1.44	3.81e-14	6.41e-12
ion binding (GO:0043167)	4707	978	775.63	+	1.26	1.33e-13	2.16e-11
catalytic activity, acting on a protein (GO:0140096)	2132	500	351.31	+	1.42	3.4e-13	5.31e-11
carbohydrate derivative binding (GO:0097367)	1965	465	323.8	+	1.44	7.6e-13	1.14e-10
transferase activity, transferring phosphorus-containing groups (GO:0016772)	861	233	141.88	+	1.64	5.27e-11	7.67e-09
Unclassified (UNCLASSIFIED)	5197	684	856.37	-	0.8	1.09e-10	1.49e-08
molecular_function (GO:0003674)	15667	2754	2581.63	+	1.07	1.09e-10	1.54e-08
receptor ligand activity (GO:0048018)	438	23	72.17	-	0.32	2.14e-10	2.83e-08
signaling receptor activator activity (GO:0030546)	446	25	73.49	-	0.34	7.92e-10	1.02e-07
signaling receptor regulator activity (GO:0030545)	471	28	77.61	-	0.36	1.09e-09	1.36e-07
kinase activity (GO:0016301)	726	196	119.63	+	1.64	2.52e-09	3.06e-07
transcription coregulator activity (GO:0003712)	384	119	63.28	+	1.88	9.14e-09	1.08e-06
transcription factor binding (GO:0008134)	452	133	74.48	+	1.79	1.79e-08	2.06e-06
protein domain specific binding (GO:0019904)	470	136	77.45	+	1.76	2.36e-08	2.64e-06
phosphotransferase activity, alcohol group as acceptor (GO:0016773)	658	176	108.43	+	1.62	3e-08	3.28e-06
channel activity (GO:0015267)	452	30	74.48	-	0.4	4.67e-08	4.85e-06
passive transmembrane transporter activity (GO:0022803)	452	30	74.48	-	0.4	4.67e-08	4.97e-06
identical protein binding (GO:0042802)	1476	337	243.22	+	1.39	5.27e-08	5.35e-06
kinase binding (GO:0019900)	593	159	97.72	+	1.63	1.22e-07	1.21e-05
peptide receptor activity (GO:0001653)	144	2	23.73	-	0.08	1.26e-07	1.23e-05
pyrophosphatase activity (GO:0016462)	660	172	108.76	+	1.58	1.66e-07	1.57e-05
hydrolase activity, acting on acid anhydrides (GO:0016817)	666	173	109.74	+	1.58	1.85e-07	1.62e-05
cytokine activity (GO:0005125)	207	7	34.11	-	0.21	1.76e-07	1.64e-05
hydrolase activity, acting on acid anhydrides, in phosphorus-containing anhydrides (GO:0016818)	666	173	109.74	+	1.58	1.85e-07	1.65e-05
DNA binding (GO:0003677)	2031	437	334.67	+	1.31	1.82e-07	1.66e-05
DNA-binding transcription factor binding (GO:0140297)	364	108	59.98	+	1.8	3.18e-07	2.72e-05
enzyme activator activity (GO:0008047)	417	119	68.71	+	1.73	3.32e-07	2.74e-05
gated channel activity (GO:0022836)	308	17	50.75	-	0.33	3.27e-07	2.75e-05
protein kinase binding (GO:0019901)	530	143	87.33	+	1.64	3.88e-07	3.14e-05
G protein-coupled peptide receptor activity (GO:0008528)	136	2	22.41	-	0.09	4.3e-07	3.42e-05
protein kinase activity (GO:0004672)	551	146	90.79	+	1.61	8.05e-07	6.28e-05
protein serine/threonine kinase activity (GO:0004674)	380	109	62.62	+	1.74	1.02e-06	7.84e-05
transcription coactivator activity (GO:0003713)	196	67	32.3	+	2.07	1.11e-06	8.34e-05
RNA polymerase II-specific DNA-binding transcription factor binding (GO:0061629)	276	85	45.48	+	1.87	1.37e-06	0.000101
ion channel activity (GO:0005216)	412	30	67.89	-	0.44	1.67e-06	0.000121
ubiquitin-like protein ligase binding (GO:0044389)	268	83	44.16	+	1.88	1.99e-06	0.000143
ATP-dependent activity (GO:0140657)	504	134	83.05	+	1.61	2.07e-06	0.000146
chromatin binding (GO:0003682)	493	131	81.24	+	1.61	2.23e-06	0.000155
ATP hydrolysis activity (GO:0016887)	308	91	50.75	+	1.79	2.95e-06	0.000201
enzyme regulator activity (GO:0030234)	1017	234	167.58	+	1.4	4.42e-06	0.000297
histone binding (GO:0042393)	210	68	34.6	+	1.97	5.24e-06	0.000347
nucleoside-triphosphatase activity (GO:0017111)	605	152	99.69	+	1.52	6.13e-06	0.000399
ubiquitin protein ligase binding (GO:0031625)	251	77	41.36	+	1.86	6.45e-06	0.000414
mRNA binding (GO:0003729)	276	82	45.48	+	1.8	7.84e-06	0.000496
serine-type endopeptidase activity (GO:0004252)	184	8	30.32	-	0.26	9.44e-06	0.000589
GTPase regulator activity (GO:0030695)	410	110	67.56	+	1.63	1.05e-05	0.000637
nucleoside-triphosphatase regulator activity (GO:0060589)	410	110	67.56	+	1.63	1.05e-05	0.000646
ubiquitin-like protein binding (GO:0032182)	104	40	17.14	+	2.33	1.85e-05	0.00111
cation channel activity (GO:0005261)	319	23	52.57	-	0.44	2.15e-05	0.00127
serine-type peptidase activity (GO:0008236)	199	10	32.79	-	0.3	2.19e-05	0.00127
molecular adaptor activity (GO:0060090)	287	82	47.29	+	1.73	2.26e-05	0.0013
ubiquitin-like protein peptidase activity (GO:0019783)	103	39	16.97	+	2.3	2.96e-05	0.00168
serine hydrolase activity (GO:0017171)	204	11	33.62	-	0.33	3.01e-05	0.00169
tubulin binding (GO:0015631)	328	90	54.05	+	1.67	3.64e-05	0.00201
transcription regulator activity (GO:0140110)	1604	336	264.31	+	1.27	4.52e-05	0.00247
serine-type endopeptidase inhibitor activity (GO:0004867)	100	2	16.48	-	0.12	4.58e-05	0.00247
catalytic activity, acting on a nucleic acid (GO:0140640)	522	129	86.02	+	1.5	6.19e-05	0.0033
protein serine kinase activity (GO:0106310)	154	50	25.38	+	1.97	7.13e-05	0.00375
translation regulator activity, nucleic acid binding (GO:0090079)	93	35	15.32	+	2.28	9.9e-05	0.00497
neurotransmitter receptor activity (GO:0030594)	108	3	17.8	-	0.17	9.59e-05	0.00499
deubiquitinase activity (GO:0101005)	93	35	15.32	+	2.28	9.9e-05	0.00503
ubiquitin binding (GO:0043130)	86	33	14.17	+	2.33	9.86e-05	0.00507
protein-macromolecule adaptor activity (GO:0030674)	231	67	38.06	+	1.76	0.000105	0.00522
damaged DNA binding (GO:0003684)	57	25	9.39	+	2.66	0.000163	0.00802
GTPase activator activity (GO:0005096)	214	62	35.26	+	1.76	0.000171	0.00829
cytoskeletal protein binding (GO:0008092)	841	188	138.58	+	1.36	0.000174	0.00834
ribonucleoprotein complex binding (GO:0043021)	126	42	20.76	+	2.02	0.000202	0.00937
translation factor activity, RNA binding (GO:0008135)	82	31	13.51	+	2.29	0.000201	0.00944
monooxygenase activity (GO:0004497)	124	5	20.43	-	0.24	0.000201	0.00953
translation regulator activity (GO:0045182)	119	40	19.61	+	2.04	0.000216	0.00985
antigen binding (GO:0003823)	88	2	14.5	-	0.14	0.000215	0.00989
nuclear receptor binding (GO:0016922)	106	37	17.47	+	2.12	0.000243	0.011
potassium channel activity (GO:0005267)	112	4	18.46	-	0.22	0.000247	0.011
hormone activity (GO:0005179)	113	4	18.62	-	0.21	0.000254	0.0112
methyltransferase activity (GO:0008168)	200	58	32.96	+	1.76	0.000294	0.0127
S-adenosylmethionine-dependent methyltransferase activity (GO:0008757)	142	45	23.4	+	1.92	0.000293	0.0128
catalytic activity, acting on DNA (GO:0140097)	202	58	33.29	+	1.74	0.000324	0.0139
potassium ion transmembrane transporter activity (GO:0015079)	142	7	23.4	-	0.3	0.000338	0.0143
voltage-gated channel activity (GO:0022832)	161	9	26.53	-	0.34	0.000354	0.0149
cation binding (GO:0043169)	3054	585	503.24	+	1.16	0.000369	0.0154
cysteine-type deubiquitinase activity (GO:0004843)	84	31	13.84	+	2.24	0.000378	0.0156
single-stranded DNA binding (GO:0003697)	98	34	16.15	+	2.11	0.000384	0.0157
magnesium ion binding (GO:0000287)	181	53	29.83	+	1.78	0.000439	0.0178
protein-containing complex binding (GO:0044877)	928	201	152.92	+	1.31	0.000459	0.0184
phosphatidylinositol binding (GO:0035091)	238	65	39.22	+	1.66	0.000471	0.0187
voltage-gated ion channel activity (GO:0005244)	159	9	26.2	-	0.34	0.000493	0.0192
histone deacetylase binding (GO:0042826)	95	33	15.65	+	2.11	0.000492	0.0194
metal ion binding (GO:0046872)	2969	568	489.24	+	1.16	0.000515	0.0199
hydrolase activity (GO:0016787)	2247	440	370.26	+	1.19	0.000532	0.0204
steroid hydroxylase activity (GO:0008395)	54	0	8.9	-	< 0.01	0.000552	0.021
transferase activity, transferring one-carbon groups (GO:0016741)	211	59	34.77	+	1.7	0.000568	0.0214
GTPase binding (GO:0051020)	236	64	38.89	+	1.65	0.000606	0.0226
ligand-gated ion channel activity (GO:0015276)	136	7	22.41	-	0.31	0.000645	0.0235
endopeptidase inhibitor activity (GO:0004866)	165	10	27.19	-	0.37	0.000651	0.0235
ligand-gated channel activity (GO:0022834)	136	7	22.41	-	0.31	0.000645	0.0237
endopeptidase regulator activity (GO:0061135)	175	11	28.84	-	0.38	0.00064	0.0237
phosphatase regulator activity (GO:0019208)	85	30	14.01	+	2.14	0.000673	0.0241
ATP-dependent activity, acting on DNA (GO:0008094)	101	34	16.64	+	2.04	0.000694	0.0246
cysteine-type peptidase activity (GO:0008234)	154	46	25.38	+	1.81	0.000704	0.0248
phosphatase binding (GO:0019902)	145	44	23.89	+	1.84	0.000717	0.0251
signaling receptor binding (GO:0005102)	1242	156	204.66	-	0.76	0.000772	0.0268
protein N-terminus binding (GO:0047485)	74	27	12.19	+	2.21	0.000825	0.0284
phospholipid binding (GO:0005543)	400	97	65.91	+	1.47	0.000878	0.0297
tetrapyrrole binding (GO:0046906)	162	10	26.69	-	0.37	0.000878	0.03
MAP kinase kinase kinase activity (GO:0004709)	20	12	3.3	+	3.64	0.000901	0.0303
ubiquitin-like protein transferase activity (GO:0019787)	386	94	63.61	+	1.48	0.000911	0.0304
ubiquitin-protein transferase activity (GO:0004842)	368	90	60.64	+	1.48	0.00111	0.0368
small GTPase binding (GO:0031267)	214	58	35.26	+	1.64	0.00115	0.0377
transmembrane transporter activity (GO:0022857)	1051	130	173.19	-	0.75	0.00131	0.0426
kinase activator activity (GO:0019209)	89	30	14.67	+	2.05	0.00134	0.0432
ligase activity (GO:0016874)	154	45	25.38	+	1.77	0.0014	0.045
kinase regulator activity (GO:0019207)	188	52	30.98	+	1.68	0.00146	0.0466
extracellular ligand-gated ion channel activity (GO:0005230)	75	2	12.36	-	0.16	0.00148	0.047
metal ion transmembrane transporter activity (GO:0046873)	387	38	63.77	-	0.6	0.00151	0.0476
